# Supplementary material for: Stable 1T-phase MoS2 as an effective electron mediator promoting photocatalytic hydrogen production
Source: Royal Society of Chemistry journal article supplement (doi:10.1039/c8nr00017d), 2018-01-01
Supplement: c8nr00017d1.pdf [file c8nr00017d1.pdf]

## Supporting Information

### **Stable 1T-phase MoS<sub>2</sub> as an effective electron mediator promoting photocatalytic hydrogen production**

Jian-Wen Shi,<sup>\*,a,c</sup> Yajun Zou,<sup>a</sup> Dandan Ma,<sup>a</sup> Zhaoyang Fan,<sup>a</sup> Linhao Cheng,<sup>a</sup> Diankun Sun,<sup>a</sup> Zeyan Wang,<sup>c</sup> Chunming Niu,<sup>a</sup> Lianzhou Wang<sup>\*,b</sup>

<sup>a</sup> *Center of Nanomaterials for Renewable Energy, State Key Laboratory of Electrical Insulation and Power Equipment, School of Electrical Engineering, Xi'an Jiaotong University, Xi'an 710049, China*

<sup>b</sup> *Nanomaterials Centre, School of Chemical Engineering and AIBN, The University of Queensland, St. Lucia, Brisbane, QLD, 4072, Australia*

<sup>c</sup> *State Key Laboratory of Crystal Materials, Shandong University, Jinan, 250100, China*

#### **Corresponding author:**

Jian-Wen Shi, E-mail: jianwen.shi@mail.xjtu.edu.cn

Lianzhou Wang, E-mail: l.wang@uq.edu.au

## 1. Tables

**Table S1.** Area value (kceV/sec) for deconvoluted peaks of CNMS samples.

| Elements                                               | CNMS-1      | CNMS-2       | CNMS-3        | CNMS-4        | CNMS-5        |
|--------------------------------------------------------|-------------|--------------|---------------|---------------|---------------|
| Mo <sup>6+</sup> 3d <sub>3/2</sub> (MoO <sub>3</sub> ) | 262.1       | 210.8        | 285.4         | 421.5         | 405.6         |
| Mo <sup>6+</sup> 3d <sub>5/2</sub> (MoO <sub>3</sub> ) | 558.2       | 424.0        | 522.9         | 701.8         | 840.1         |
| Mo <sup>4+</sup> 3d <sub>5/2</sub> (MoO <sub>2</sub> ) | 76.7        | 73.9         | 95.6          | 113.0         | 157.5         |
| Mo <sup>4+</sup> 3d <sub>5/2</sub> (MoS <sub>2</sub> ) | 69.4 (6.8%) | 89.9 (10.6%) | 124.5 (11.3%) | 176.2 (11.7%) | 228.6 (13.0%) |
| S <sup>2-</sup> 2s                                     | 44.1 (4.3%) | 52.9 (6.2%)  | 71.1 (6.5%)   | 98.0 (6.5%)   | 129.3 (7.3%)  |
| S 2p <sub>1/2</sub>                                    | 33.4        | 53.6         | 56.1          | 60.3          | 71.2          |
| S 2p <sub>3/2</sub>                                    | 44.7        | 55.6         | 63.4          | 92.7          | 107.5         |

**Table S2.** Structural parameters of the samples.

| Samples                         | S <sub>BET</sub> (m <sup>2</sup> ·g <sup>-1</sup> ) | Pore size (nm) | V <sub>pore</sub> (cm <sup>3</sup> ·g <sup>-1</sup> ) |
|---------------------------------|-----------------------------------------------------|----------------|-------------------------------------------------------|
| g-C <sub>3</sub> N <sub>4</sub> | 5.89                                                | 3.94           | 0.15                                                  |
| CNMO                            | 32.35                                               | 3.94           | 0.39                                                  |
| CNMS-1                          | 35.94                                               | 3.94           | 0.35                                                  |
| CNMS-2                          | 36.57                                               | 3.85           | 0.48                                                  |
| CNMS-3                          | 37.29                                               | 3.92           | 0.47                                                  |
| CNMS-4                          | 39.97                                               | 3.50           | 0.40                                                  |
| CNMS-5                          | 42.52                                               | 3.24           | 0.43                                                  |

## 2. Figures

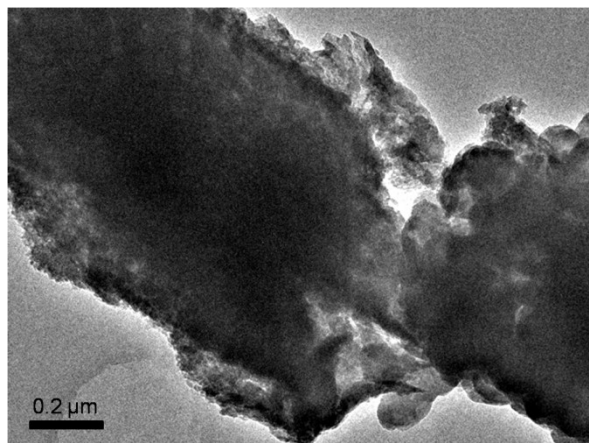

**Fig. S1.** TEM image of the pure g-C<sub>3</sub>N<sub>4</sub>.

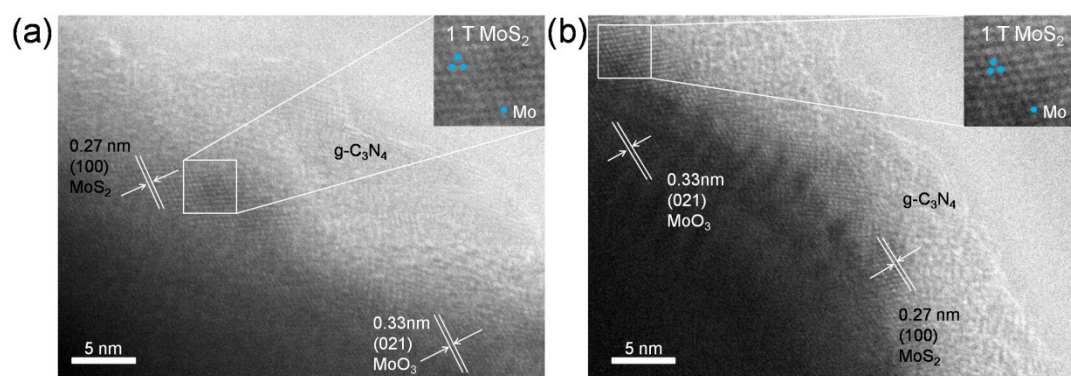

**Fig. S2.** TEM images of CNMS-3 (a) and CNMS-4 (b) (the insets shows the region enclosed by the white square of images in (a) and (b), respectively).

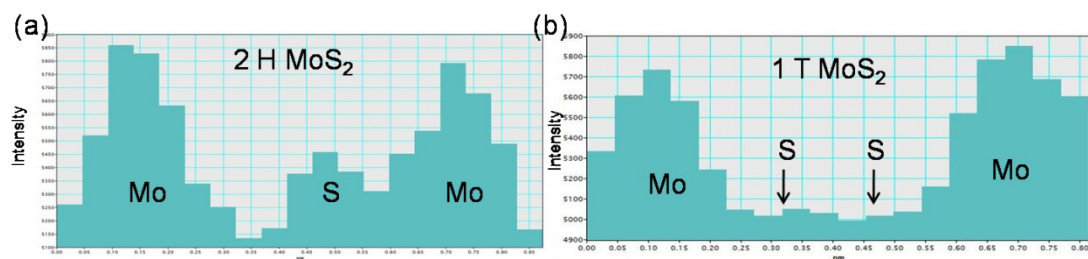

**Fig. S3.** (a-b) Intensity profiles along the green lines indicated in Fig. 1c and d, respectively.

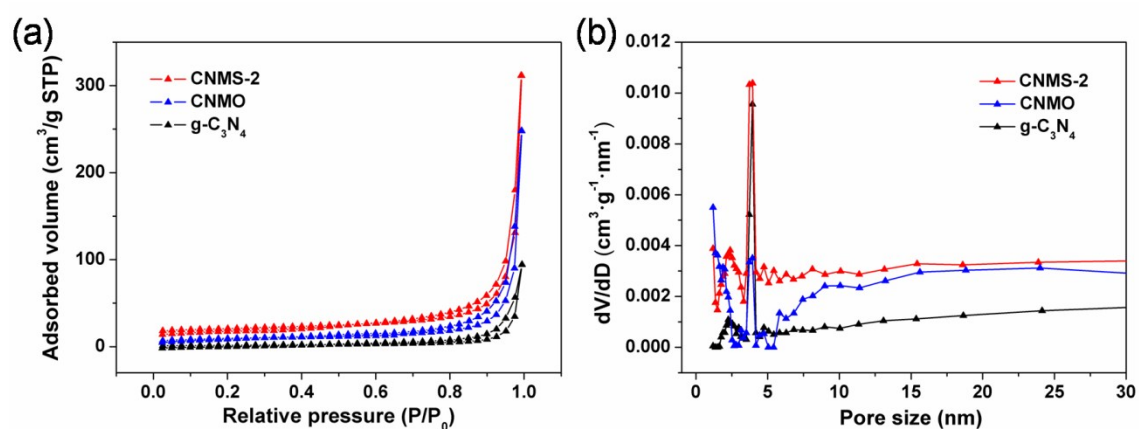

**Fig. S4.** N<sub>2</sub> adsorption-desorption isotherms (a) and pore size distribution curves (b) of g-C<sub>3</sub>N<sub>4</sub>,

CNMO and CNMS-2 samples.

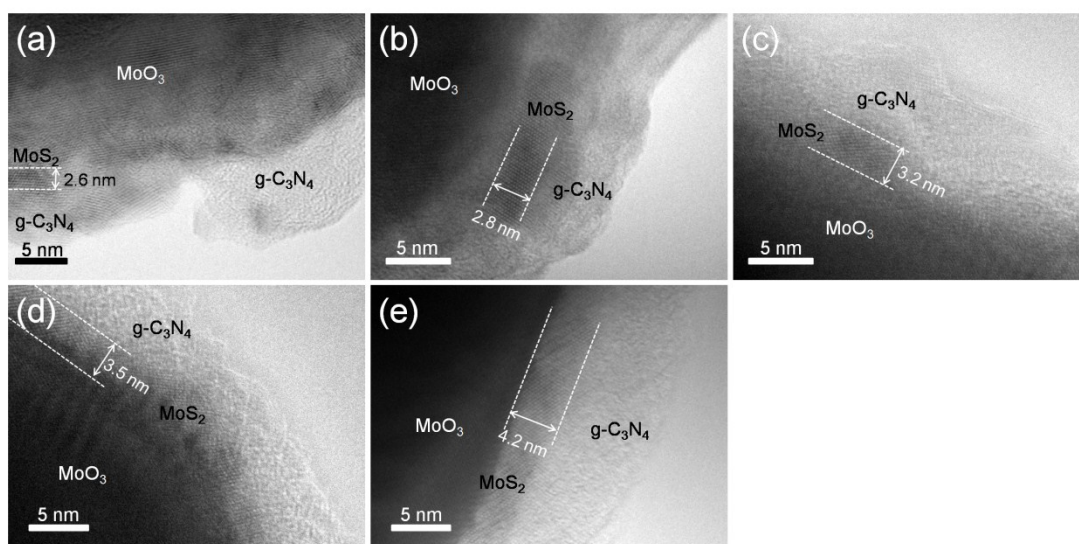

**Fig. S5.** The thickness of MoS<sub>2</sub> layers in CNMS-1 (a), CNMS-2 (b), CNMS-3 (c), CNMS-4 (d) and CNMS-5 (e).

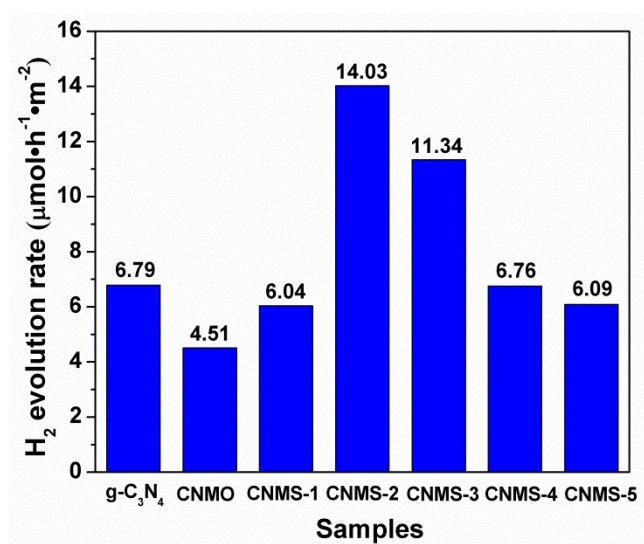

**Fig. S6.** H<sub>2</sub> production rates of the samples under visible-light irradiation ( $\lambda > 420$  nm) normalized to the corresponding BET surface areas.

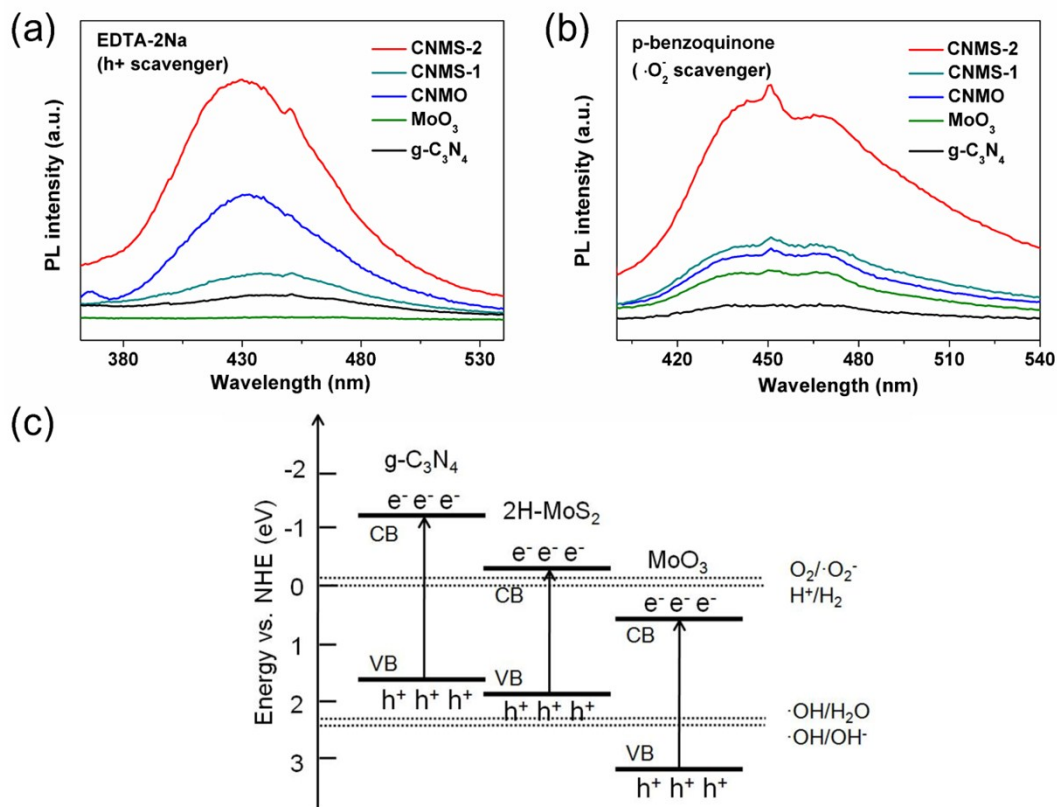

**Fig. S7.** The PL spectral intensities (excitation at 315 nm) observed for MoO<sub>3</sub>, g-C<sub>3</sub>N<sub>4</sub>, CNMO, CNMS-1 and CNMS-2 under visible light irradiation (>420 nm) for 15 min in a  $5 \times 10^{-4}$  M basic solution of terephthalic acid with h<sup>+</sup> scavenger: EDTA-Na<sub>2</sub> (a) and with ·O<sub>2</sub><sup>-</sup> scavenger: p-benzoquinone (b), band positions of MoO<sub>3</sub>, g-C<sub>3</sub>N<sub>4</sub>, and 2H-MoS<sub>2</sub> together with O<sub>2</sub>/·O<sub>2</sub><sup>-</sup>, H<sup>+</sup>/H<sub>2</sub>, ·OH/H<sub>2</sub>O and ·OH/OH<sup>-</sup> redox potentials (c).

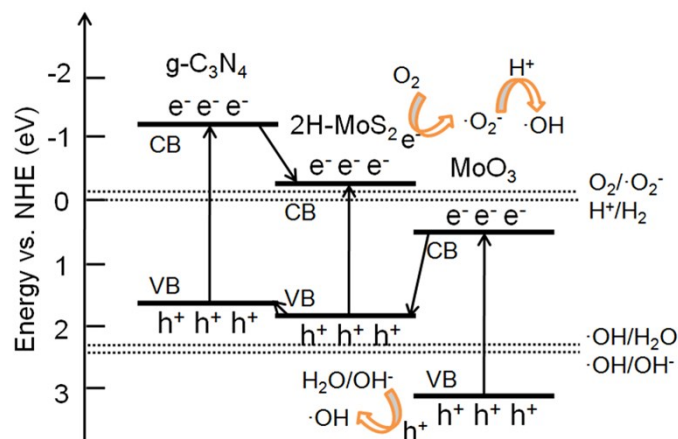

**Fig. S8.** Pathways of  $\bullet\text{OH}$  produced from  $\text{MoO}_3/2\text{H-MoS}_2/\text{g-C}_3\text{N}_4$ .

Compared with CNMO, CNMS-1 exhibits a weaker PL peak intensity in the presence of EDTA- $\text{Na}_2$  as  $\text{h}^+$  scavenger. This suggests that the  $\bullet\text{OH}$  radicals are originated from the photoexcited electrons in the CB of the 2H-phase  $\text{MoS}_2$ , which can be explained by the fact that the electrons on the CB of the 2H-phase  $\text{MoS}_2$  possess lower reduction ability than those on the CB of  $\text{g-C}_3\text{N}_4$ , and therefore, the PL emission peak intensity of CNMS-1 should be weaker than that of CNMO. Meanwhile, when p-benzoquinone was added as the  $\bullet\text{O}_2^-$  scavenger, a stronger PL peak intensity was observed in CNMS-1 compared with CNMO, suggesting that the holes generated  $\bullet\text{OH}$  radicals must be in the VB of  $\text{MoO}_3$ . Thus, it can be concluded that the photogenerated charge carriers transferred via the traditional heterojunction mechanism between  $\text{g-C}_3\text{N}_4$  and the 2H-phase  $\text{MoS}_2$  and migrated through the direct Z-scheme mechanism between the 2H-phase  $\text{MoS}_2$  and  $\text{MoO}_3$  (**Fig. S8**).

### 3. Solar-to-hydrogen conversion efficiency (STH) calculations

The solar-to-hydrogen energy conversion efficiency (STH) was evaluated by using a 300 W Xenon arc lamp (PLS-SXE300) with a 420 nm cutoff filter as light source (25.8 mW/cm<sup>2</sup>) and CNMS-2 sample as the catalyst (10 mg catalyst in 20 mL deionized water). The light intensity was obtained with an optical power meter (CEL-NP2000, CEAULIGHT, Beijing). After 4 h of illumination, the total incident power over the 28.3 cm<sup>2</sup> irradiation area (3 cm radius) was:

$$P_{\text{Solar}} = 25.8 \times 28.3 \times 10^{-3} = 0.73 \text{ W}$$

The total input energy in 4 hours was:

$$E_{\text{Solar}} = 0.73 \times 4 \times 3600 = 1.051 \times 10^4 \text{ J}$$

During the photocatalytic reaction, 20.52  $\mu\text{mol}$  H<sub>2</sub> was detected by gas chromatography (GC), which indicated that the energy generated by water splitting was:

$E_{\text{Hydrogen}} = 20.52 \times 10^{-6} \times 6.02 \times 10^{23} \times 2.46 \times 1.609 \times 10^{-19} = 4.89 \text{ J}$ ; 2.46 eV is the free energy of water splitting.

The STH was determined to be:

$$\text{STH} = E_{\text{Hydrogen}}/E_{\text{Solar}} = 4.89/(1.051 \times 10^4) = 0.047\%$$
